# Supplementary material for: miR-214-3p Is Commonly Downregulated by EWS-FLI1 and by CD99 and Its Restoration Limits Ewing Sarcoma Aggressiveness
Source: MDPI journal article supplement (doi:10.3390/cancers14071762), 2022-03-30
Supplement: s1 [file s1]

Supplemental TableS2: List of cell lines used in this study

| Cell lines                                                   | Origin                                           | Modification                                                                                                                                                                                                                                    | References                                                                    |
|--------------------------------------------------------------|--------------------------------------------------|-------------------------------------------------------------------------------------------------------------------------------------------------------------------------------------------------------------------------------------------------|-------------------------------------------------------------------------------|
| HS128, HS196, HS244, HS249, HS128                            | Human bone-marrow derived mesenchymal stem cells |                                                                                                                                                                                                                                                 | Amaral A.T. et al PLoS One 2014, 9, e85814.                                   |
| LAP-35                                                       | Ewing sarcoma                                    |                                                                                                                                                                                                                                                 | Bagnara et al. Int. J Cell Cloning 1990 Nov;8(6):409-24                       |
| A673                                                         | Ewing sarcoma                                    |                                                                                                                                                                                                                                                 | CLS Cat#300454/p491_A-673                                                     |
| IOR-BRZ                                                      | Ewing sarcoma                                    |                                                                                                                                                                                                                                                 | Guerzoni C. et al. Clin Cancer Res 2015, 21, 146-156.                         |
| IOR-CAR*                                                     | Ewing sarcoma                                    |                                                                                                                                                                                                                                                 | Guerzoni C. et al. Clin Cancer Res 2015, 21, 146-156.                         |
| RD-ES                                                        | Ewing sarcoma                                    |                                                                                                                                                                                                                                                 | CLS Cat#300410/p763_RD-ES                                                     |
| SK-ES-1                                                      | Ewing sarcoma                                    |                                                                                                                                                                                                                                                 | CLS Cat# 300435/p738_SK-ES-1                                                  |
| TC-71 *                                                      | Ewing sarcoma                                    |                                                                                                                                                                                                                                                 | Provided by T.J Triche (Children's Hospital, Los Angeles).                    |
| SK-N-MC                                                      | Ewing sarcoma                                    |                                                                                                                                                                                                                                                 | ATCC Cat# CRL-2270                                                            |
| PDX-EW#5-C*                                                  | PDX Ewing sarcoma                                |                                                                                                                                                                                                                                                 | Nanni et al. Sci Rep 2019, 9,12174                                            |
| PDX-EW#2-C*                                                  | PDX Ewing sarcoma                                |                                                                                                                                                                                                                                                 | Nanni et al. Sci Rep 2019, 9,12174                                            |
| TC-71-CD99shRNA                                              | Ewing sarcoma                                    | shRNA plasmid (pSilencer 2.1-U6 Neo vector; Ambion) (5'-GATCCGGCTGGCCATTATT AAGTCTTCAAGAGAGACTT AATAATGGCCAGCCTTTTT GGAAA-3') using the calcium phosphate transfection method.                                                                  | Rocchi A et al. J Clin Invest 2010, 120, 668-680.                             |
| A673/TR/shEF                                                 | Ewing sarcoma                                    | shRNA plasmid (pENTR-BLOCK-iT; Invitrogen) (shEF forward, 5'-CACCGCAGCAGAACCCTTC TTATGACGAATCATAAGAA GGGTCTGCTGC-3'; shEF reverse, 5' AAAAGCAGCAGAACCCTT CTTATGATTCTGCATAAGA AGGGTCTGCTGC-3 using lentivirus method                             | Carrillo J. et al. Clin Cancer Res 2007, 13, 2429-2440.                       |
| A673p6TR/pTERshCD99                                          | Ewing sarcoma                                    | pcDNA3.1/6TR (Thermo Fisher Scientific ) encoding the reverse tetracycline-responsive transcriptional activator and the plasmid pTER vector, and engineered to express CD99 shRNA Transfection was performed using TransIT-X2 (MIR 6000, Mirus) | Balestra T et al. Mol Cancer Ther 2022 21(1):58-69).                          |
| SK-N-MC EV<br>SK-N-MC miR-214-3p#12<br>SK-N-MC miR-214-3p#34 | Ewing sarcoma                                    | pcDNA3.1/V5-His-Topo-expression vector (Invitrogen), miR-214 5' CACCTTTCTCCCTTTCCCC TTA CT TACTCTCC-3' and 5' TGCCTTTCCCCAGTGCCTCT TTCTC-3'. Transfection was performed using Lipofectamine 2000 (ThermoFisher)                                 | Provided by H. Kovar (St. Anna Children's Cancer Research Institute, Vienna). |

\*TC-71, IOR-CAR and PDX-EW#2-C cells were transiently transfected with pre-miR-214-3p mimic, and PDX-EW#5-C cells were transfected with antagomiR-214-3p or nonspecific control miRNAs (SCR) (30 nM) (assays #AM17100 and #AM171000; Ambion) and siHMGA1(20nM) (M-004597-02-0020 GE Healthcare Dharmacon) or si-GENOME\_nontargeting (D-001206-13-05, GE Healthcare Dharmacon) using a TransIT-X2 Dynamic Delivery System (Mir6000, Mirus).
